# Supplementary material for: Performance Analysis of Inter-Domain Handoff Scheme Based on Virtual Layer in PMIPv6 Networks for IP-Based Internet of Things
Source: PubMed Central journal article supplement (PMC5271355; doi:10.1371/journal.pone.0170566), 2017-01-27
Supplement: pone.0170566.s001.pdf [file pone.0170566.s001.pdf]

■ **OUTPUT DATA**

**Fig 14. Signal Cost for Velocity**

| Velocity | Pre-FMIPv6 | Re-FMIPv6 | MIPv6 | PMIPv6 | HMIPv6 | Proposed |
|----------|------------|-----------|-------|--------|--------|----------|
| 0        | 0.0        | 0.0       | 0.0   | 0.0    | 0.0    | 0.0      |
| 5        | 40.6       | 39.3      | 35.5  | 12.8   | 8.3    | 8.3      |
| 10       | 81.2       | 78.5      | 71.1  | 25.5   | 16.5   | 16.5     |
| 15       | 121.8      | 117.8     | 106.6 | 38.3   | 24.8   | 24.8     |
| 20       | 162.3      | 157.0     | 142.1 | 51.0   | 33.0   | 33.0     |
| 25       | 202.9      | 196.3     | 177.7 | 63.8   | 41.3   | 41.3     |
| 30       | 243.5      | 235.5     | 213.2 | 76.5   | 49.5   | 49.5     |

**Fig 15. Signal Cost for Radius**

| Radius | Pre-FMIPv6 | Re-FMIPv6 | MIPv6 | PMIPv6 | HMIPv6 | Proposed |
|--------|------------|-----------|-------|--------|--------|----------|
| 400    | 201.6      | 194.3     | 172.7 | 41.4   | 15.3   | 15.3     |
| 450    | 178.2      | 171.9     | 153.4 | 35.7   | 12.5   | 12.5     |
| 500    | 159.3      | 153.5     | 137.0 | 31.3   | 10.1   | 10.1     |
| 550    | 143.8      | 138.3     | 122.8 | 27.2   | 8.2    | 8.2      |
| 600    | 131.0      | 125.9     | 112.0 | 24.1   | 6.7    | 6.7      |
| 650    | 120.1      | 115.4     | 102.3 | 21.3   | 5.3    | 5.3      |
| 700    | 110.7      | 106.4     | 94.2  | 19.1   | 4.1    | 4.1      |
| 750    | 102.7      | 98.6      | 87.2  | 17.1   | 3.2    | 3.2      |
| 800    | 95.7       | 91.7      | 81.1  | 15.4   | 2.3    | 2.3      |

**Fig 16. Packet Delivery Dost for Session Arrival Rate**

| Session Arrival Rate | HMIPv6 | PMIPv6 | Proposed | Pre-FMIPv6 | Re-FMIPv6 | MIPv6 |
|----------------------|--------|--------|----------|------------|-----------|-------|
| 0                    | 0.0    | 0.0    | 0.0      | 0.0        | 0.0       | 0.0   |
| 0.1                  | 225.5  | 167.5  | 167.5    | 118.0      | 118.0     | 86.0  |
| 0.2                  | 451.0  | 335.0  | 335.0    | 236.0      | 236.0     | 172.0 |
| 0.3                  | 676.5  | 502.5  | 502.5    | 354.0      | 354.0     | 258.0 |
| 0.4                  | 902.0  | 670.0  | 670.0    | 472.0      | 472.0     | 344.0 |
| 0.5                  | 1127.5 | 837.5  | 837.5    | 590.0      | 590.0     | 430.0 |
| 0.6                  | 1353.0 | 1005.0 | 1005.0   | 708.0      | 708.0     | 516.0 |
| 0.7                  | 1578.5 | 1172.5 | 1172.5   | 826.0      | 826.0     | 602.0 |
| 0.8                  | 1804.0 | 1340.0 | 1340.0   | 944.0      | 944.0     | 688.0 |
| 0.9                  | 2029.5 | 1507.5 | 1507.5   | 1062.0     | 1062.0    | 774.0 |
| 1                    | 2255.0 | 1675.0 | 1675.0   | 1180.0     | 1180.0    | 860.0 |

**Fig 17. Packet Delivery Dost for Indirect Path Routing Ratio**

| Indirect Path Routing Ratio | Pre-FMIPv6 | Re-FMIPv6 | MIPv6  | HMIPv6 | PMIPv6 | Proposed |
|-----------------------------|------------|-----------|--------|--------|--------|----------|
| 0.1                         | 544.0      | 544.0     | 384.0  | 2260.0 | 1670.0 | 1670.0   |
| 0.2                         | 1088.0     | 1088.0    | 768.0  | 2260.0 | 1670.0 | 1670.0   |
| 0.3                         | 1632.0     | 1632.0    | 1152.0 | 2260.0 | 1670.0 | 1670.0   |
| 0.4                         | 2176.0     | 2176.0    | 1536.0 | 2260.0 | 1670.0 | 1670.0   |
| 0.5                         | 2720.0     | 2720.0    | 1920.0 | 2260.0 | 1670.0 | 1670.0   |
| 0.6                         | 3264.0     | 3264.0    | 2304.0 | 2260.0 | 1670.0 | 1670.0   |
| 0.7                         | 3808.0     | 3808.0    | 2688.0 | 2260.0 | 1670.0 | 1670.0   |
| 0.8                         | 4352.0     | 4352.0    | 3072.0 | 2260.0 | 1670.0 | 1670.0   |
| 0.9                         | 4896.0     | 4896.0    | 3456.0 | 2260.0 | 1670.0 | 1670.0   |
| 1                           | 5440.0     | 5440.0    | 3840.0 | 2260.0 | 1670.0 | 1670.0   |

**Fig 18. Packet Tunneling Cost for Session Arrival Rate**

| Indirect Path Routing Ratio | Pre-FMIPv6 | Re-FMIPv6 | MIPv6  | HMIPv6 | PMIPv6 | Proposed |
|-----------------------------|------------|-----------|--------|--------|--------|----------|
| 0.1                         | 544.0      | 544.0     | 384.0  | 2260.0 | 1670.0 | 1670.0   |
| 0.2                         | 1088.0     | 1088.0    | 768.0  | 2260.0 | 1670.0 | 1670.0   |
| 0.3                         | 1632.0     | 1632.0    | 1152.0 | 2260.0 | 1670.0 | 1670.0   |
| 0.4                         | 2176.0     | 2176.0    | 1536.0 | 2260.0 | 1670.0 | 1670.0   |
| 0.5                         | 2720.0     | 2720.0    | 1920.0 | 2260.0 | 1670.0 | 1670.0   |
| 0.6                         | 3264.0     | 3264.0    | 2304.0 | 2260.0 | 1670.0 | 1670.0   |
| 0.7                         | 3808.0     | 3808.0    | 2688.0 | 2260.0 | 1670.0 | 1670.0   |
| 0.8                         | 4352.0     | 4352.0    | 3072.0 | 2260.0 | 1670.0 | 1670.0   |
| 0.9                         | 4896.0     | 4896.0    | 3456.0 | 2260.0 | 1670.0 | 1670.0   |
| 1                           | 5440.0     | 5440.0    | 3840.0 | 2260.0 | 1670.0 | 1670.0   |

**Fig 19. Packet Tunneling Cost for Indirect Path Routing Ratio**

| Session Arrival Rate | HMIPv6 | PMIPv6 | Proposed | Pre-FMIPv6 | Re-FMIPv6 | MIPv6 |
|----------------------|--------|--------|----------|------------|-----------|-------|
| 0.1                  | 226.0  | 167.5  | 167.5    | 118.0      | 118.0     | 86.0  |
| 0.2                  | 452.0  | 335.0  | 335.0    | 236.0      | 236.0     | 172.0 |
| 0.3                  | 678.0  | 502.5  | 502.5    | 354.0      | 354.0     | 258.0 |
| 0.4                  | 904.0  | 670.0  | 670.0    | 472.0      | 472.0     | 344.0 |
| 0.5                  | 1130.0 | 837.5  | 837.5    | 590.0      | 590.0     | 430.0 |
| 0.6                  | 1356.0 | 1005.0 | 1005.0   | 708.0      | 708.0     | 516.0 |

|     |        |        |        |        |        |       |
|-----|--------|--------|--------|--------|--------|-------|
| 0.7 | 1582.0 | 1172.5 | 1172.5 | 826.0  | 826.0  | 602.0 |
| 0.8 | 1808.0 | 1340.0 | 1340.0 | 944.0  | 944.0  | 688.0 |
| 0.9 | 2034.0 | 1507.5 | 1507.5 | 1062.0 | 1062.0 | 774.0 |
| 1   | 2260.0 | 1675.0 | 1675.0 | 1180.0 | 1180.0 | 860.0 |

**Fig 20. Total Cost for Session-to-Mobility Ratio**

| Session-to-Mobility Ratio | Pre-FMIPv6 | Re-FMIPv6 | MIPv6 | HMIPv6 | PMIPv6 | Proposed |
|---------------------------|------------|-----------|-------|--------|--------|----------|
| 0.0                       | 954.0      | 928.0     | 791.0 | 541.0  | 509.0  | 422.0    |
| 5.0                       | 380.0      | 374.0     | 297.0 | 470.0  | 370.0  | 353.0    |
| 10.0                      | 309.0      | 306.0     | 235.0 | 461.0  | 352.0  | 344.0    |
| 15.0                      | 285.0      | 282.0     | 213.0 | 457.0  | 346.0  | 340.0    |
| 20.0                      | 272.0      | 270.0     | 202.0 | 456.0  | 343.0  | 339.0    |
| 25.0                      | 266.0      | 263.0     | 195.0 | 455.0  | 342.0  | 338.0    |
| 30.0                      | 261.0      | 259.0     | 193.0 | 454.0  | 341.0  | 337.0    |

**Fig 21. Total Cost for Session-to-Mobility Ratio**

| Session-to-Mobility Ratio | Pre-FMIPv6 | Re-FMIPv6 | MIPv6  | HMIPv6 | PMIPv6 | Proposed |
|---------------------------|------------|-----------|--------|--------|--------|----------|
| 0.0                       | 1806.0     | 1780.0    | 1388.0 | 548.0  | 510.0  | 422.0    |
| 5.0                       | 1234.0     | 1226.0    | 894.0  | 472.0  | 374.0  | 352.0    |
| 10.0                      | 1162.0     | 1156.0    | 830.0  | 462.0  | 354.0  | 344.0    |
| 15.0                      | 1136.0     | 1134.0    | 810.0  | 456.0  | 346.0  | 340.0    |
| 20.0                      | 1116.0     | 1116.0    | 792.0  | 454.0  | 342.0  | 338.0    |
| 25.0                      | 1112.0     | 1112.0    | 788.0  | 452.0  | 341.0  | 337.0    |
| 30.0                      | 1111.0     | 1111.0    | 786.0  | 452.0  | 340.0  | 336.0    |
